# Supplementary material
Source: MDPI journal article supplement (https://www.mdpi.com/1996-1073/14/22/7776)

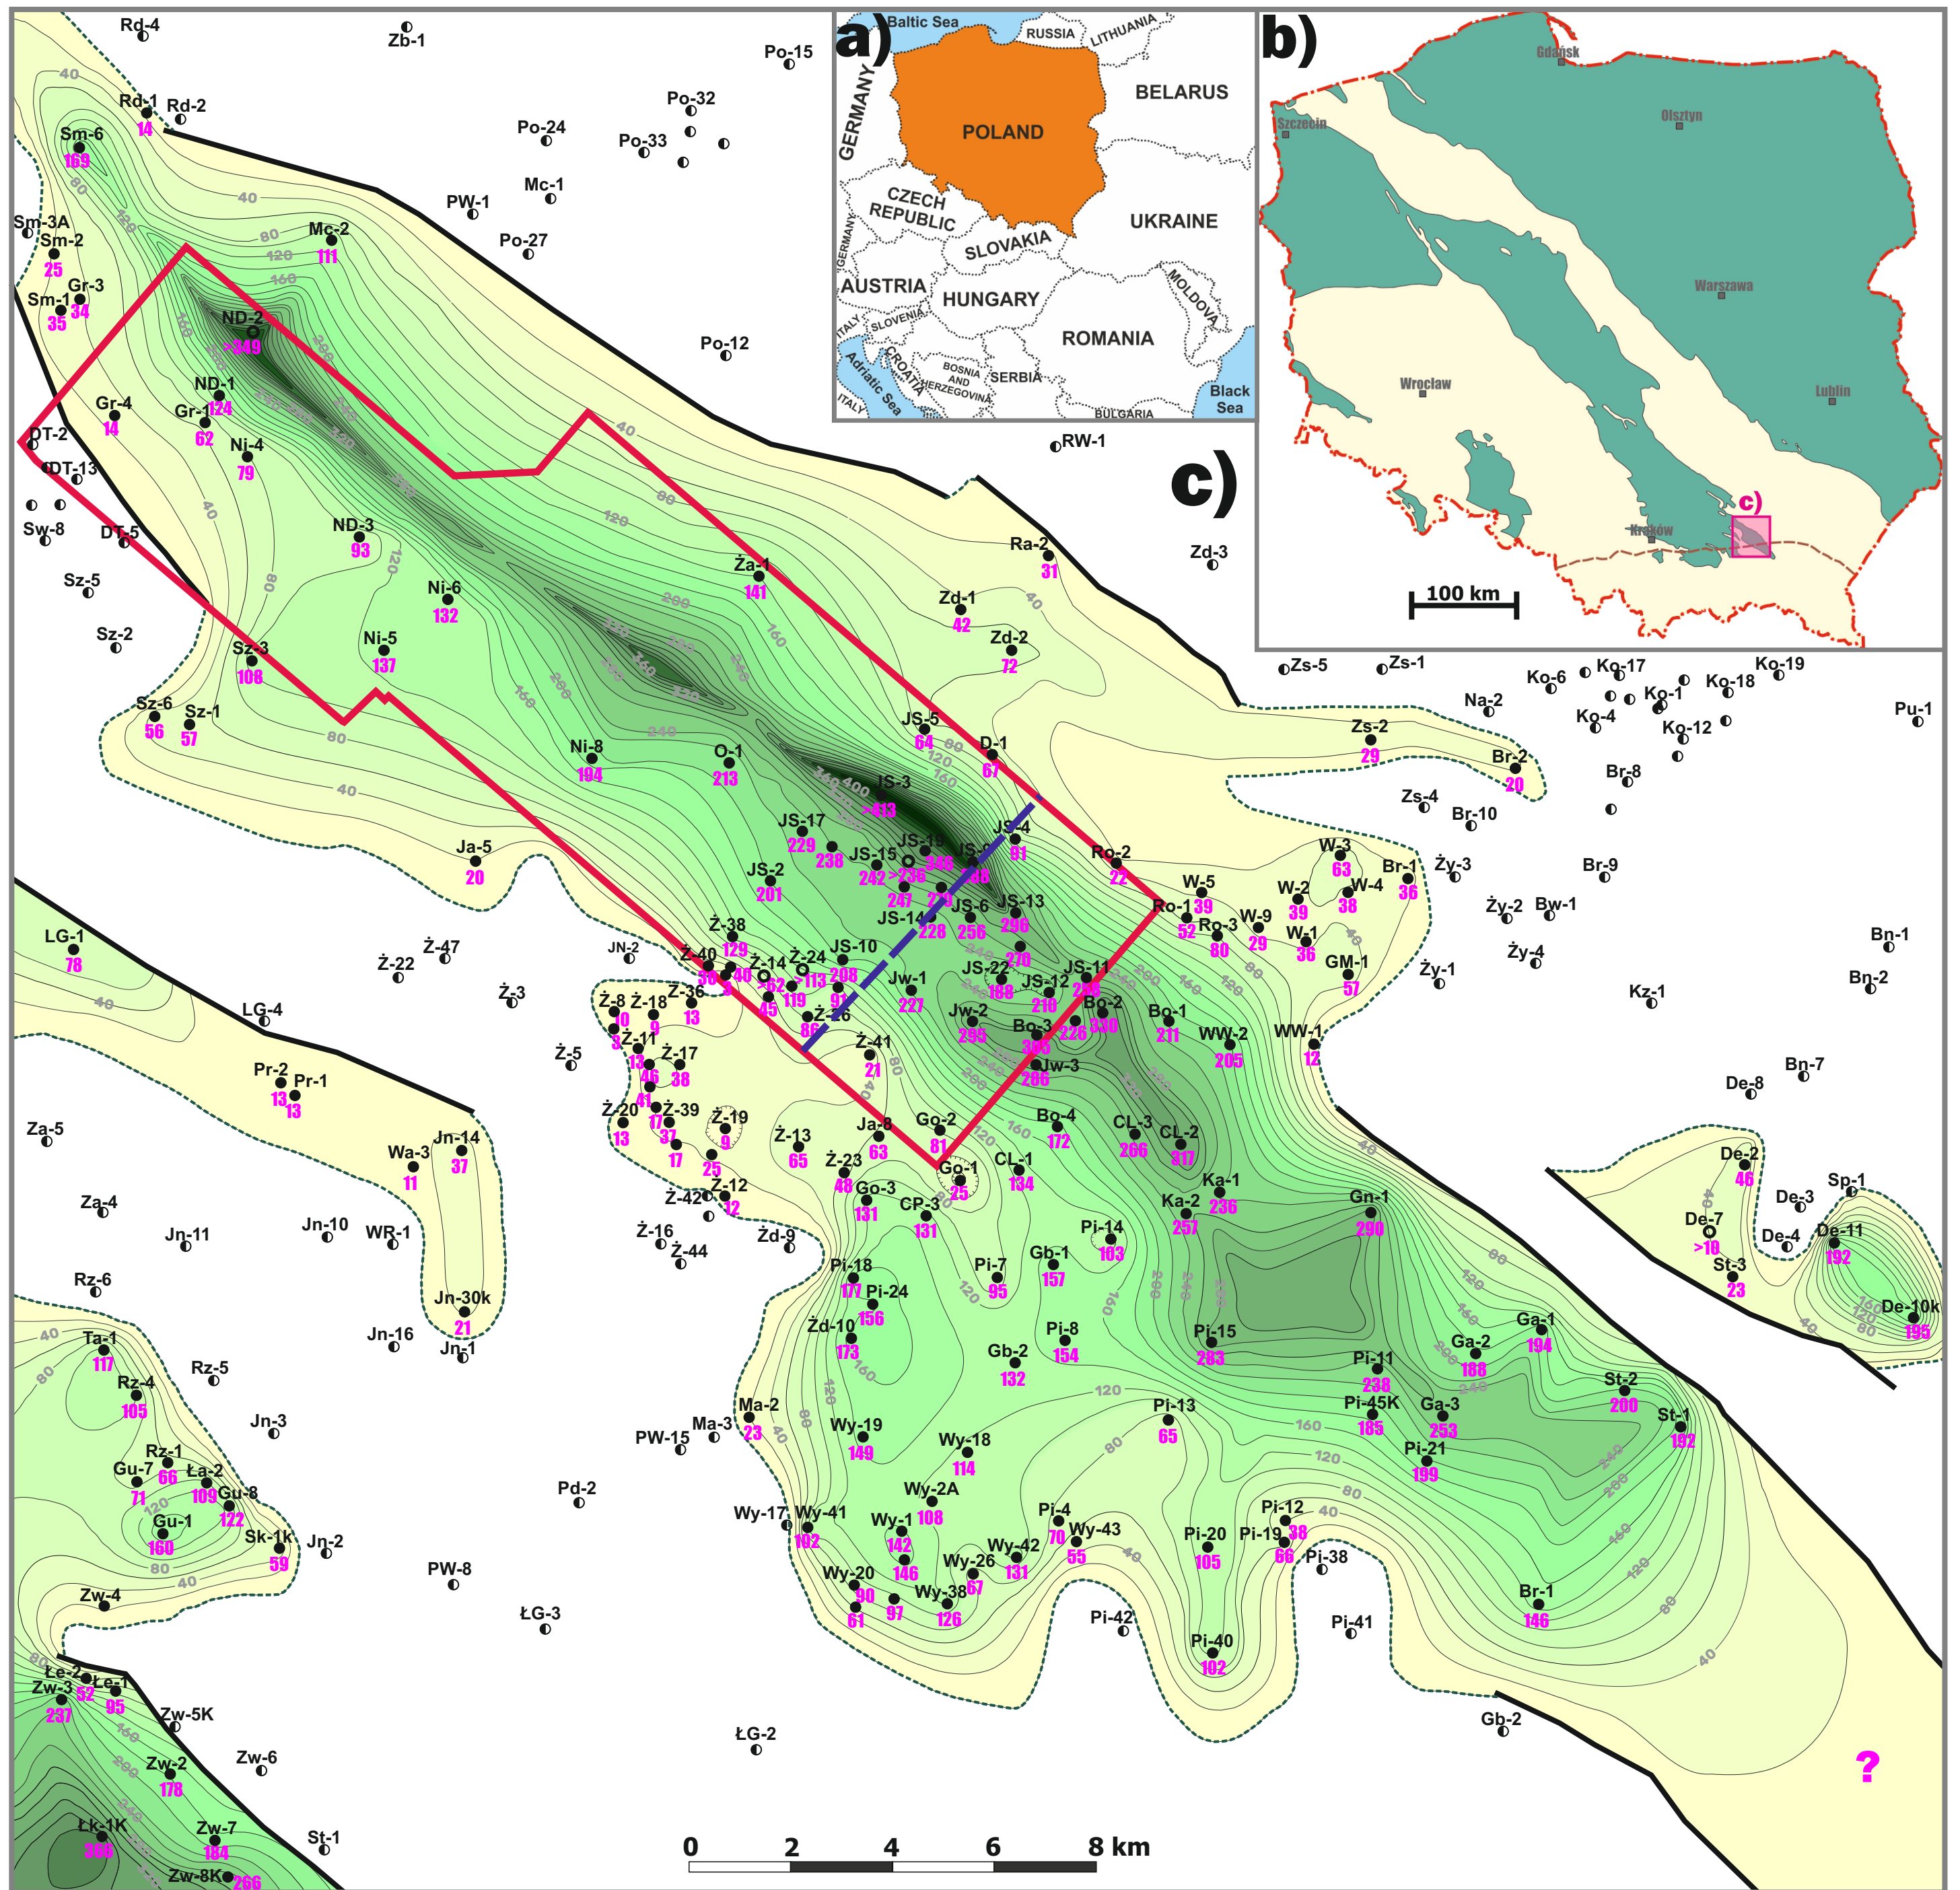

**b)**

- distribution of the Upper Cretaceous sediments in extra-Carpathian Poland
- Pre-Upper Cretaceous sediments
- Outer Carpathians frontal thrust
- state border
- map of the coverage area (c)

**c)**

- Gb-1 wells that have penetrated full profile of Upper Cretaceous formations
- Ż-14 wells that have stopped drilling in Upper Cretaceous formations
- Na-2 wells that have not encountered Upper Cretaceous formations
- isopachs
- 156 thickness of Upper Cretaceous sediments recorded in well
- range of Upper Cretaceous sediments
- faults limiting the range of Upper Cretaceous sediments
- analyzed 3D seismic survey
- interpreted section XL170

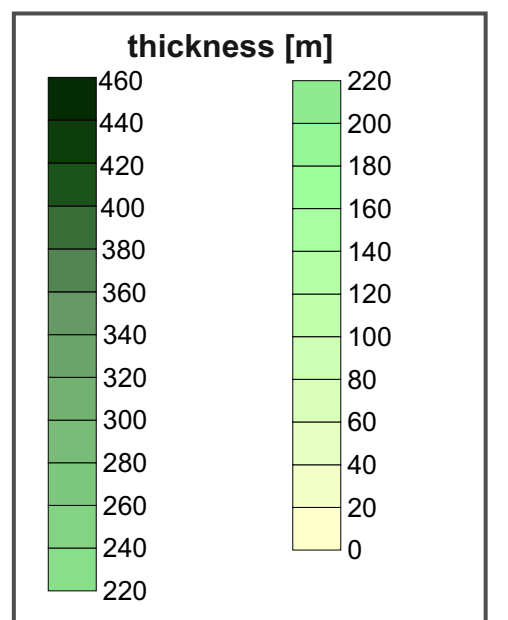

Supplement: s1 [file s1]
